# Supplementary material for: Root Metabolism and Effects of Root Exudates on the Growth of Ralstonia solanacearum and Fusarium moniliforme Were Significantly Different between the Two Genotypes of Peanuts
Source: MDPI journal article supplement (doi:10.3390/genes14020528), 2023-02-20
Supplement: s1 [file s1]

a

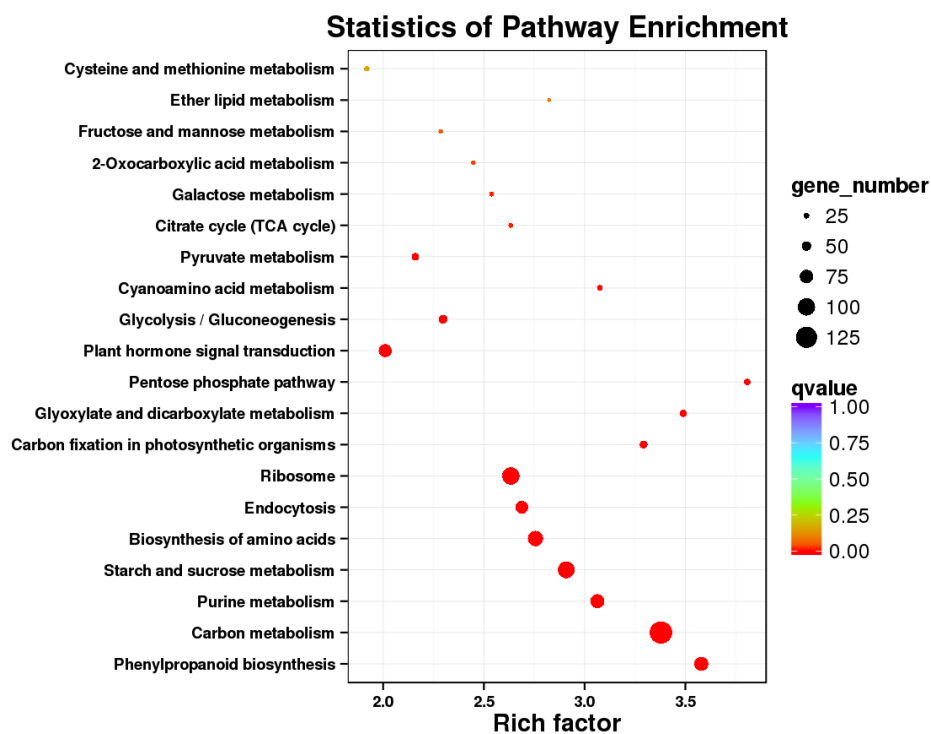

b

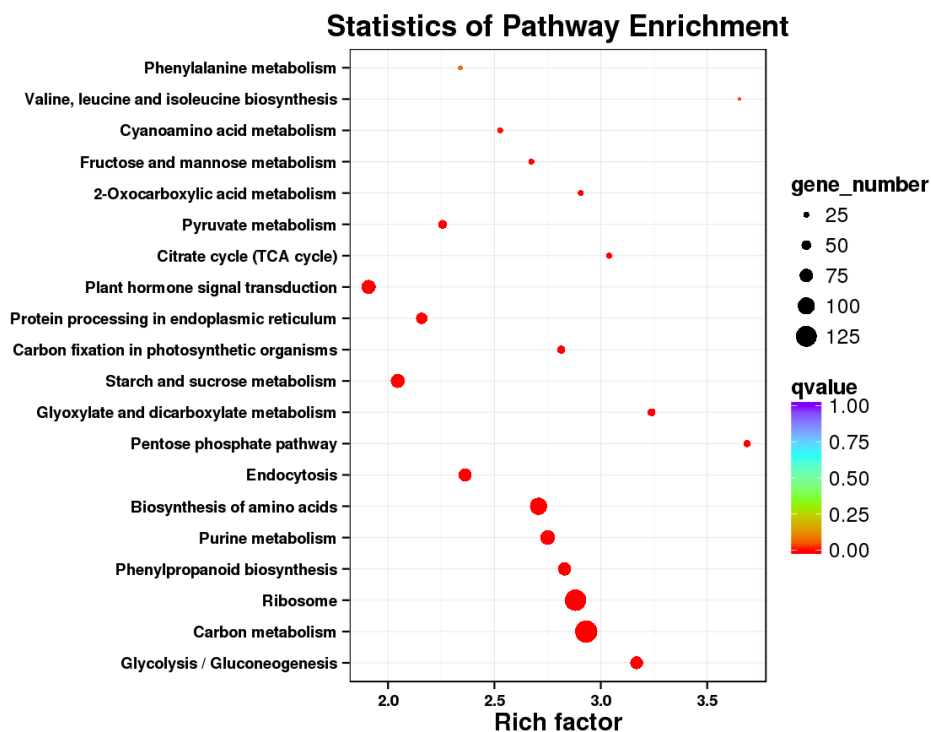

**Figure S1. Enrichment analysis for KEGG pathways of DGEs between *A. correntina* and GH85. a: *A. correntina* -30d\_vs\_GH85-30d. b: *A. correntina* -60d\_vs\_GH85-60d.**

a

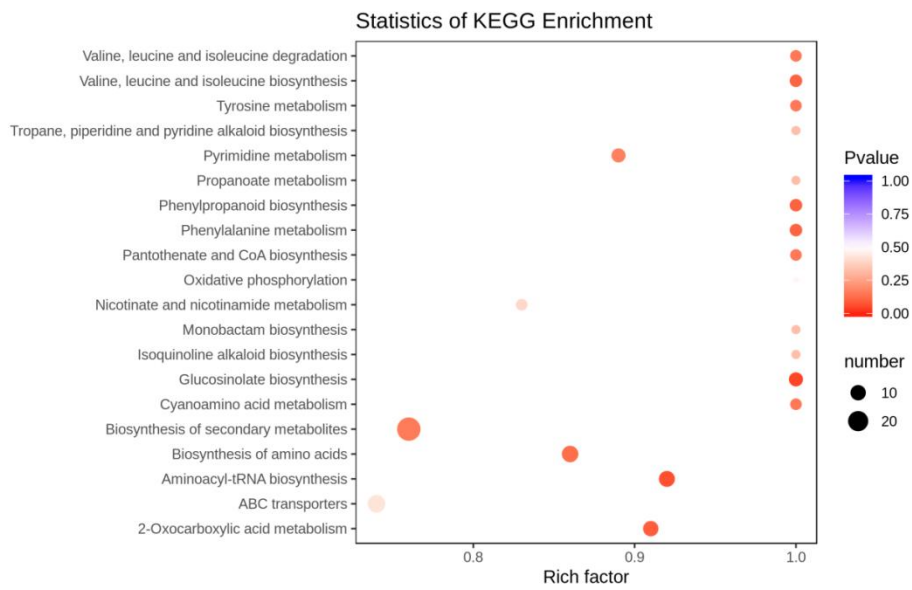

b

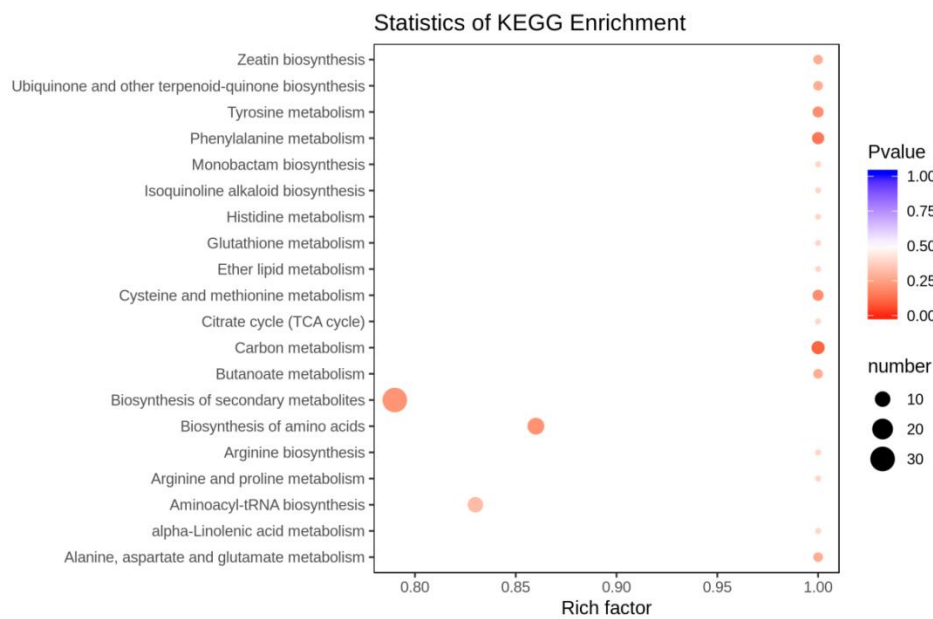

**Figure S2. Enrichment analysis for KEGG pathways of DEMs between *A. correntina* and GH85. a: *A. correntina* -30d\_vs\_GH85-30d. b: *A. correntina* -60d\_vs\_GH85-60d.**
